# Supplementary material for: Electron ionization of the nucleobases adenine and hypoxanthine near the threshold: a combined experimental and theoretical study
Source: Royal Society of Chemistry journal article supplement (doi:10.1039/c4cp03452j), 2014-10-08
Supplement: c4cp03452j1.pdf [file c4cp03452j1.pdf]

**Electronic Supplementary Information**  
**Electron ionization of the nucleobases adenine and hypoxanthine**  
**near the threshold:**  
**A combined experimental and theoretical study**

M. Michele Dawley<sup>1,†</sup>, Katrin Tanzer<sup>3,†</sup>, William Alex Cantrell<sup>1,†</sup>, Peter Plattner<sup>3</sup>,  
Nicole R. Brinkmann<sup>1</sup>, Paul Scheier<sup>3</sup>, Stephan Denifl<sup>3</sup>, and Sylwia Ptasińska<sup>1,2</sup>

<sup>1</sup>*Radiation Laboratory and* <sup>2</sup>*Department of Physics, University of Notre Dame, Notre Dame, Indiana 46556, USA*  
<sup>3</sup>*Institut für Ionenphysik, Leopold Franzens Universität Innsbruck, Technikerstr. 25, A-6020 Innsbruck, Austria*

†These authors contributed equally.

Table S1. Appearance energies (AEs) for other minor cations produced upon electron impact ionization of adenine. Fragment assignments are made based on refs. <sup>1,2</sup>.

| Cation                      | Mass ( $m/z$ ) | Experimental AE (eV)               |
|-----------------------------|----------------|------------------------------------|
| $C_4H_3N_4^+ / C_5H_5N_3^+$ | 107            | $13.94 \pm 0.3$                    |
| $C_3H_2N_3^+$               | 80             | $15.12 \pm 0.5$                    |
| $C_2H_4N_3^+$               | 70             | $14.89 \pm 0.2$                    |
| $C_3H_3N_2^+ / C_2HN_3^+$   | 67             | $15.59 \pm 0.3$                    |
| $C_3H_2N_2^+ / C_2N_3^+$    | 66             | $14.16 \pm 0.3$                    |
| $C_3HN_2^+$                 | 65             | $17.88 \pm 0.4$                    |
| $NH_2CNH^+ / C_2H_5N^+$     | 43             | $14.01 \pm 0.3$                    |
| $NCN^+$                     | 40             | $15.67 \pm 0.3$<br>$18.52 \pm 0.4$ |
| $HCCN^+$                    | 39             | $18.13 \pm 0.2$                    |
| $NH_2CH^+$                  | 29             | $15.15 \pm 0.15$                   |
| $HCN^+$                     | 27             | $13.48 \pm 0.2$                    |

Table S2. Appearance energies (AEs) for other minor cations produced upon electron impact ionization of hypoxanthine. Fragment assignments are made based on ref.<sup>3</sup>.

| Cation                                          | Mass ( $m/z$ ) | Experimental AE (eV) |
|-------------------------------------------------|----------------|----------------------|
| $^{13}\text{C}_5\text{H}_4\text{N}_4\text{O}^+$ | 137            | $8.80 \pm 0.5$       |
| $\text{C}_4\text{H}_3\text{N}_3\text{O}^+$      | 109            | $12.34 \pm 0.3$      |
| $\text{C}_3\text{H}_2\text{N}_2\text{O}^+$      | 82             | $12.61 \pm 0.3$      |
| $\text{C}_3\text{H}_2\text{N}_3^+$              | 80             | $14.35 \pm 0.5$      |

Table S3. Absolute energies and zero-point corrected energies (ZPE) for the most stable cations and neutral conformers from adenine calculated using B3LYP/6-311+G(2d,p).

| Cation                             | Mass ( $m/z$ ) | Absolute energy (h) | Zero-Point corrected energy (h) |
|------------------------------------|----------------|---------------------|---------------------------------|
| $\text{C}_5\text{H}_5\text{N}_5^+$ | 135            | -467.1663893        | -467.054801                     |
| $\text{C}_4\text{H}_4\text{N}_4^+$ | 108            | -373.5429667        | -373.460192                     |
| $\text{C}_3\text{H}_3\text{N}_3^+$ | 81             | -280.0703798        | -280.007429                     |
| $\text{C}_2\text{H}_2\text{N}_2^+$ | 54             | -186.5514422        | -186.515235                     |
| $\text{C}_2\text{HN}_2^+$          | 53             | -185.9467569        | -185.921894                     |
| $\text{HCNH}^+$                    | 28             | -93.73493916        | -93.709041                      |
| Neutral fragment                   | Mass ( $m/z$ ) | Absolute energy (h) | Zero-Point corrected energy (h) |
| $\text{C}_4\text{H}_3\text{N}_4$   | 107            | -373.1807003        | -373.109067                     |
| $\text{C}_3\text{H}_4\text{N}_3$   | 82             | -281.0271762        | -280.953091                     |
| $\text{C}_3\text{H}_3\text{N}_3$   | 81             | -280.3794029        | -280.318791                     |
| $\text{C}_2\text{H}_2\text{N}_2$   | 54             | -186.8626753        | -186.824131                     |
| HCN                                | 27             | -93.45625859        | -93.441723                      |
| CN                                 | 26             | -92.73347225        | -92.729601                      |
| H                                  | 1              | -0.50215593         | -0.502156                       |

Table S4. Absolute energies and zero-point corrected energies (ZPE) for the most stable cations and neutral conformers from hypoxanthine calculated using B3LYP/6-311+G(2d,p).

| Cation           | Mass ( $m/z$ ) | Absolute energy (h) | Zero-Point corrected energy (h) |
|------------------|----------------|---------------------|---------------------------------|
| $C_5H_4N_4O^+$   | 136            | -487.0287338        | -486.92981                      |
| $C_4H_2N_3O^+$   | 108            | -392.8174957        | -392.756789                     |
| $C_4H_4N_4^+$    | 108            | -373.6346216        | -373.546866                     |
| $C_3H_3N_3^+$    | 81             | -280.0703798        | -280.0703798                    |
| $C_3HN_2O^+$     | 81             | -299.3307092        | -299.29332                      |
| $C_3H_2N_3^+$    | 80             | -279.4518876        | -279.402985                     |
| $C_2H_2N_2^+$    | 54             | -186.5514422        | -186.515235                     |
| $C_2NO^+$        | 54             | -205.8031015        | -205.78799                      |
| $C_2HN_2^+$      | 53             | -185.9467569        | -185.921894                     |
| $HCNH^+$         | 28             | -93.73493916        | -93.709041                      |
| $CO^+$           | 28             | -112.8300751        | -112.824847                     |
| Neutral fragment | Mass ( $m/z$ ) | Absolute energy (h) | Zero-Point corrected energy (h) |
| $C_4H_2N_3O$     | 108            | -393.0282591        | -392.971073                     |
| $C_4H_4N_4$      | 108            | -373.9245758        | -373.836136                     |
| $C_3H_3N_2O$     | 83             | -300.9147819        | -300.852479                     |
| $C_3H_4N_3$      | 82             | -281.0267752        | -280.952194                     |
| $C_2H_3N_2$      | 55             | -187.4848886        | -187.4848886                    |
| $C_2H_2N_2$      | 54             | -186.9278986        | -186.888652                     |
| $HCNH$           | 28             | -94.00287677        | -93.977139                      |
| $CO$             | 28             | -113.3520125        | -113.3520125                    |
| $HCN$            | 27             | -93.441723          | -93.441723                      |
| $CN$             | 26             | -92.73347225        | -92.729601                      |
| $H$              | 1              | -0.50215593         | -0.502156                       |

## REFERENCES

1. H. W. Jochims, M. Schwell, H. Baumgärtel and S. Leach, *Chem. Phys.*, 2005, 314, 263-282.
2. V. V. Afrosimov, A. A. Basalaev, Y. G. Morozov, M. N. Panov, O. V. Smirnov and E. A. Tropp, *Tech. Phys.*, 2012, 57, 594-602.
3. J. M. Rice and G. O. Dudek, *J. Am. Chem. Soc.*, 1967, 89, 2719-2725.
